# Supplementary material for: Inactivation of TFEB and NF-κB by marchantin M alleviates the chemotherapy-driven pro-tumorigenic senescent secretion
Source: PubMed Central journal article supplement — Acta Pharm Sin B. 2019 Aug 31;9(5):923–36. doi: 10.1016/j.apsb.2019.08.007 (PMC6804491; doi:10.1016/j.apsb.2019.08.007), 2019-08-31
Supplement: mmc3.pdf [file mmc3.pdf]

## Supporting Information for

### Original article

## Inactivation of TFEB and NF- $\kappa$ B by marchantin M alleviates the chemotherapy-driven pro-tumorigenic senescent secretion

Huanmin Niu<sup>a,†</sup>, Lilin Qian<sup>a,†</sup>, Bin Sun<sup>b</sup>, Wenjian Liu<sup>a</sup>, Fang Wang<sup>a</sup>, Qian Wang<sup>a</sup>, Xiaotian Ji<sup>a</sup>, Yanhai Luo<sup>a</sup>, Effat Un Nesa<sup>c</sup>, Hongxiang Lou<sup>b</sup>, Huiqing Yuan<sup>a,\*</sup>

<sup>a</sup>*Institute of Medical Sciences/Department of Biochemistry and Molecular Biology, the Second Hospital of Shandong University, Jinan 250033, China*

<sup>b</sup>*Key Laboratory of Natural Products & Chemical Biology, Ministry of Education, Department of Natural Products Chemistry, School of Pharmaceutical Sciences, Shandong University, Jinan 250012, China.*

<sup>c</sup>*Department of Radiation Oncology, Qilu Hospital of Shandong University, Jinan 250012, China*

Received 1 July 2019; received in revised form 4 August 2019; accepted 19 August 2019

\*Corresponding Author. Tel.: +86 531 85875027.

E-mail: [lyuanhq@sdu.edu.cn](mailto:lyuanhq@sdu.edu.cn) (Huiqing Yuan).

†These authors made equal contributions to this work.

**Table S1** The primers used in this experiment.

| Name                                 |         | Primer                   |
|--------------------------------------|---------|--------------------------|
| Human <i>IL-1<math>\alpha</math></i> | Forward | GGTTGAGTTTAAGCCAATCCA    |
|                                      | Reverse | TGCTGACCTAGGCTTGATGA     |
| Human <i>IL-1<math>\beta</math></i>  | Forward | GTCGGAGATTCGTAGCTGGAT    |
|                                      | Reverse | CTCGCCAGTGAAATGATGGCT    |
| Human <i>IL-6</i>                    | Forward | TCAATGAGGAGACTTGCCTGG    |
|                                      | Reverse | GGCTGGCATTGTGGTTGG       |
| Human <i>IL-8</i>                    | Forward | AGACAGCAGAGCACACAAGC     |
|                                      | Reverse | ATGGTTCCTTCCGGTGGT       |
| Human <i>TNF-<math>\alpha</math></i> | Forward | CAGCCTCTTCTCCTTCCTGAT    |
|                                      | Reverse | GCCAGAGGGCTGATTAGAGA     |
| Human <i>IFN-<math>\gamma</math></i> | Forward | TCGGTAACTGACTTGAATGTCCA  |
|                                      | Reverse | TCGCTTCCCTGTTTTAGCTGC    |
| Human <i>IL-4</i>                    | Forward | CAGACATCTTTGCTGCCTCC     |
|                                      | Reverse | AGCTGCTTGTGCCTGTGG       |
| Human <i>IL-5</i>                    | Forward | ATCTTTCAGGGAATAGGCACA    |
|                                      | Reverse | TTGCAGGTAGTCTAGGAATTGGTT |
| Human <i>IL-10</i>                   | Forward | AAGCTGAGAACCAAGACCCAGACA |
|                                      | Reverse | AAAGGCATTCTTCACCTGCTCCAC |
| Human <i>IL-13</i>                   | Forward | CACTGGGCCTCATGGCGCTT     |
|                                      | Reverse | TGGCACTGCAGCCTGACACG     |

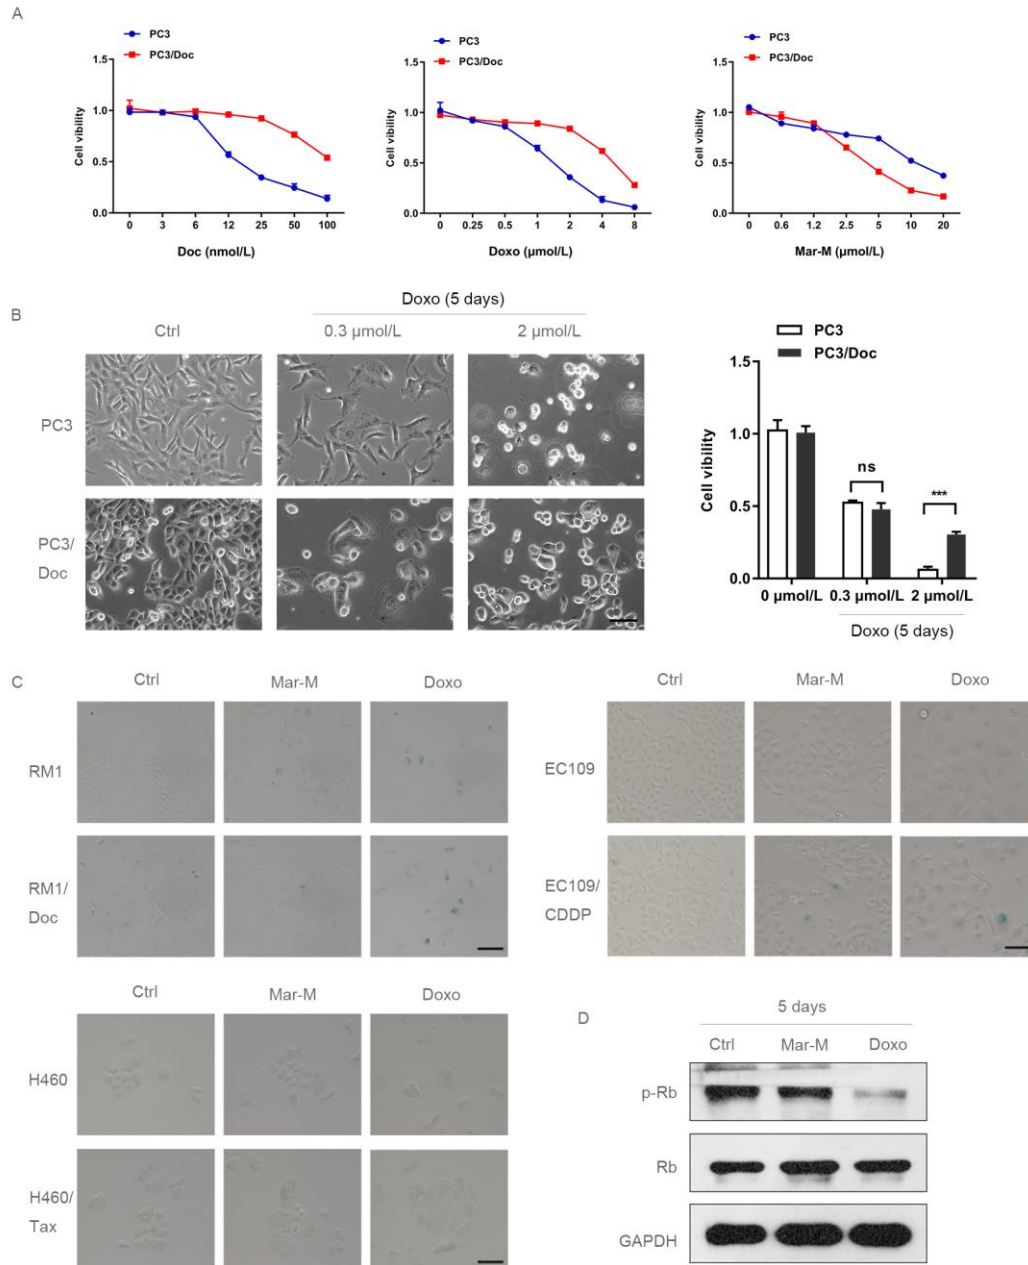

**Figure S1** Marchantin M induces senescence in other drug-resistant cells. (A) Survival rates of PC3 and PC3/Doc cells treated with doxorubicin (Doxo), docetaxel (Doc), and Mar-M. (B) Morphology and proliferation changes for PC3 and PC3/Doc cells under Doxo prolonged treatment. Scale bar: 100  $\mu\text{m}$ . (C) SA- $\beta$ -gal expression in RM1, RM1/Doc, H460, H460/RT, EC109, EC109/CDDP cells treated with 1  $\mu\text{mol/L}$  Mar-M for 1 day. Scale bar: 100  $\mu\text{m}$ . (D) Western blot analysis of the expression of Rb and p-Rb in PC3/Doc cells treatment with Mar-M for 5 days.
